# Supplementary material for: Physical activity and activity space in patients with pulmonary fibrosis not prescribed supplemental oxygen
Source: Springer Nature journal article supplement (doi:10.1186/s12890-017-0495-2), 2017-11-23
Supplement: MOESM1 [file 15249238]

## Supplementary materials

### Physical activity and activity space in patients with pulmonary fibrosis not prescribed supplemental oxygen

Elisabeth Dowling Root, PhD<sup>1,3</sup>  
Bridget Graney, MD<sup>2,4</sup>  
Susan Baird<sup>3</sup>  
Tara Charney, MPH<sup>3,4</sup>  
Kaitlin Fier, MPH<sup>3,4</sup>  
Marjorie Korn<sup>4</sup>  
Mark McCormick<sup>4</sup>  
David Sprunger, MD<sup>4,5</sup>  
Thomas Vierzba<sup>4</sup>  
Frederick S. Wamboldt, MD<sup>4,5</sup>  
Jeffrey J. Swigris, DO, MS<sup>3,4,5</sup>

<sup>1</sup>Department of Geography and Division of Epidemiology, The Ohio State University, Columbus, OH, USA

<sup>2</sup>Division of Pulmonary Sciences and Critical Care Medicine, University of Colorado Anschutz Medical Campus, Aurora, CO USA

<sup>3</sup>Autoimmune Lung Center and Interstitial Lung Disease Program, National Jewish Health, Southside Building, Office #G011 1400 Jackson Street Denver, CO 80206, USA

<sup>4</sup>Participation Program for Pulmonary Fibrosis (P3F), Denver, CO, USA

<sup>5</sup>Division of Pulmonary, Critical Care and Sleep Medicine, Sleep & Behavioral Health Sciences Section, National Jewish Health, Denver, CO, USA

Funding: This project was funded via PCORI contract CE 12-11-4134 (Dr. Swigris PI). The views are those of the authors and not necessarily PCORI's.

#### To whom correspondence should be addressed:

Elisabeth Dowling Root  
Department of Geography  
The Ohio State University  
1036 Derby Hall  
154 North Oval Mall  
Columbus, OH 43210 USA  
Phone: 614-292-1882  
Email: root.145@osu.edu

**Table E1.** Spearman correlation coefficients showing association between wearables and other outcomes.

| Variable | SDE    | RNB    | Steps  | ModVig | SedT   | FVC%   | DLCO%  | FSS    | LCQ    | PF     | RP     | BP     | GH     | VT     | SF     | RE     | MH     | UCSD  |
|----------|--------|--------|--------|--------|--------|--------|--------|--------|--------|--------|--------|--------|--------|--------|--------|--------|--------|-------|
| SDE      | 1.000  |        |        |        |        |        |        |        |        |        |        |        |        |        |        |        |        |       |
| RNB      | 0.915  | 1.000  |        |        |        |        |        |        |        |        |        |        |        |        |        |        |        |       |
| Steps    | 0.140  | 0.156  | 1.000  |        |        |        |        |        |        |        |        |        |        |        |        |        |        |       |
| ModVig   | 0.091  | 0.083  | 0.885  | 1.000  |        |        |        |        |        |        |        |        |        |        |        |        |        |       |
| SedT     | -0.088 | -0.092 | -0.333 | -0.283 | 1.000  |        |        |        |        |        |        |        |        |        |        |        |        |       |
| FVC%     | 0.033  | 0.065  | 0.064  | -0.011 | -0.145 | 1.000  |        |        |        |        |        |        |        |        |        |        |        |       |
| DLCO%    | 0.065  | 0.062  | 0.177  | 0.121  | -0.072 | 0.394  | 1.000  |        |        |        |        |        |        |        |        |        |        |       |
| FSS      | 0.010  | -0.034 | -0.339 | -0.267 | 0.145  | -0.262 | -0.196 | 1.000  |        |        |        |        |        |        |        |        |        |       |
| LCQ      | -0.081 | -0.027 | 0.223  | 0.143  | 0.045  | 0.257  | 0.191  | -0.544 | 1.000  |        |        |        |        |        |        |        |        |       |
| PF       | 0.035  | 0.067  | 0.343  | 0.233  | -0.062 | 0.250  | 0.289  | -0.651 | 0.490  | 1.000  |        |        |        |        |        |        |        |       |
| RP       | 0.028  | 0.027  | 0.286  | 0.233  | -0.050 | 0.197  | 0.243  | -0.756 | 0.440  | 0.655  | 1.000  |        |        |        |        |        |        |       |
| BP       | 0.086  | 0.101  | 0.229  | 0.200  | -0.124 | 0.073  | -0.079 | -0.488 | 0.305  | 0.360  | 0.379  | 1.000  |        |        |        |        |        |       |
| GH       | -0.097 | -0.043 | 0.271  | 0.215  | 0.040  | 0.153  | 0.201  | -0.529 | 0.456  | 0.453  | 0.475  | 0.318  | 1.000  |        |        |        |        |       |
| VT       | 0.002  | 0.017  | 0.281  | 0.246  | -0.083 | 0.254  | 0.137  | -0.823 | 0.512  | 0.601  | 0.681  | 0.542  | 0.559  | 1.000  |        |        |        |       |
| SF       | 0.078  | 0.121  | 0.272  | 0.221  | -0.141 | 0.114  | 0.157  | -0.704 | 0.472  | 0.566  | 0.656  | 0.548  | 0.547  | 0.697  | 1.000  |        |        |       |
| RE       | 0.062  | 0.078  | 0.208  | 0.162  | -0.119 | 0.145  | 0.125  | -0.614 | 0.323  | 0.377  | 0.594  | 0.371  | 0.391  | 0.553  | 0.673  | 1.000  |        |       |
| MH       | 0.010  | 0.051  | 0.108  | 0.074  | -0.090 | 0.136  | -0.086 | -0.494 | 0.345  | 0.320  | 0.342  | 0.340  | 0.410  | 0.548  | 0.586  | 0.454  | 1.000  |       |
| UCSD     | 0.008  | -0.038 | -0.249 | -0.156 | 0.016  | -0.280 | -0.296 | 0.657  | -0.548 | -0.832 | -0.648 | -0.320 | -0.491 | -0.597 | -0.548 | -0.444 | -0.378 | 1.000 |

Green=statistically significant accounting for multiple comparisons; SDE=standard deviational ellipse; RNB=road network buffer; Steps=average steps per day; ModVig=moderate to vigorous physical activity; SedT=average sedentary time; FVC%=percent predicted forced vital capacity; DLCO%=percent predicted diffusion capacity of the lung for carbon monoxide; FSS=Fatigue Severity Survey; LCQ=Leicester Cough Questionnaire; Medical Outcomes Study Short-Form 36-item Questionnaire domains (PF=Physical Functioning; RP=Role Physical; BP=Bodily Pain; GH=General Health; VT=Vitality; SF=Social Functioning; RE=Role Emotional; MH=Mental Health); UCSD=University of California San Diego Shortness of Breath Questionnaire

Figure E1: Relationship between Activity Space Measures (SDE and RNB) and Physical Activity Measures (% of time Sedentary and in MVPA)

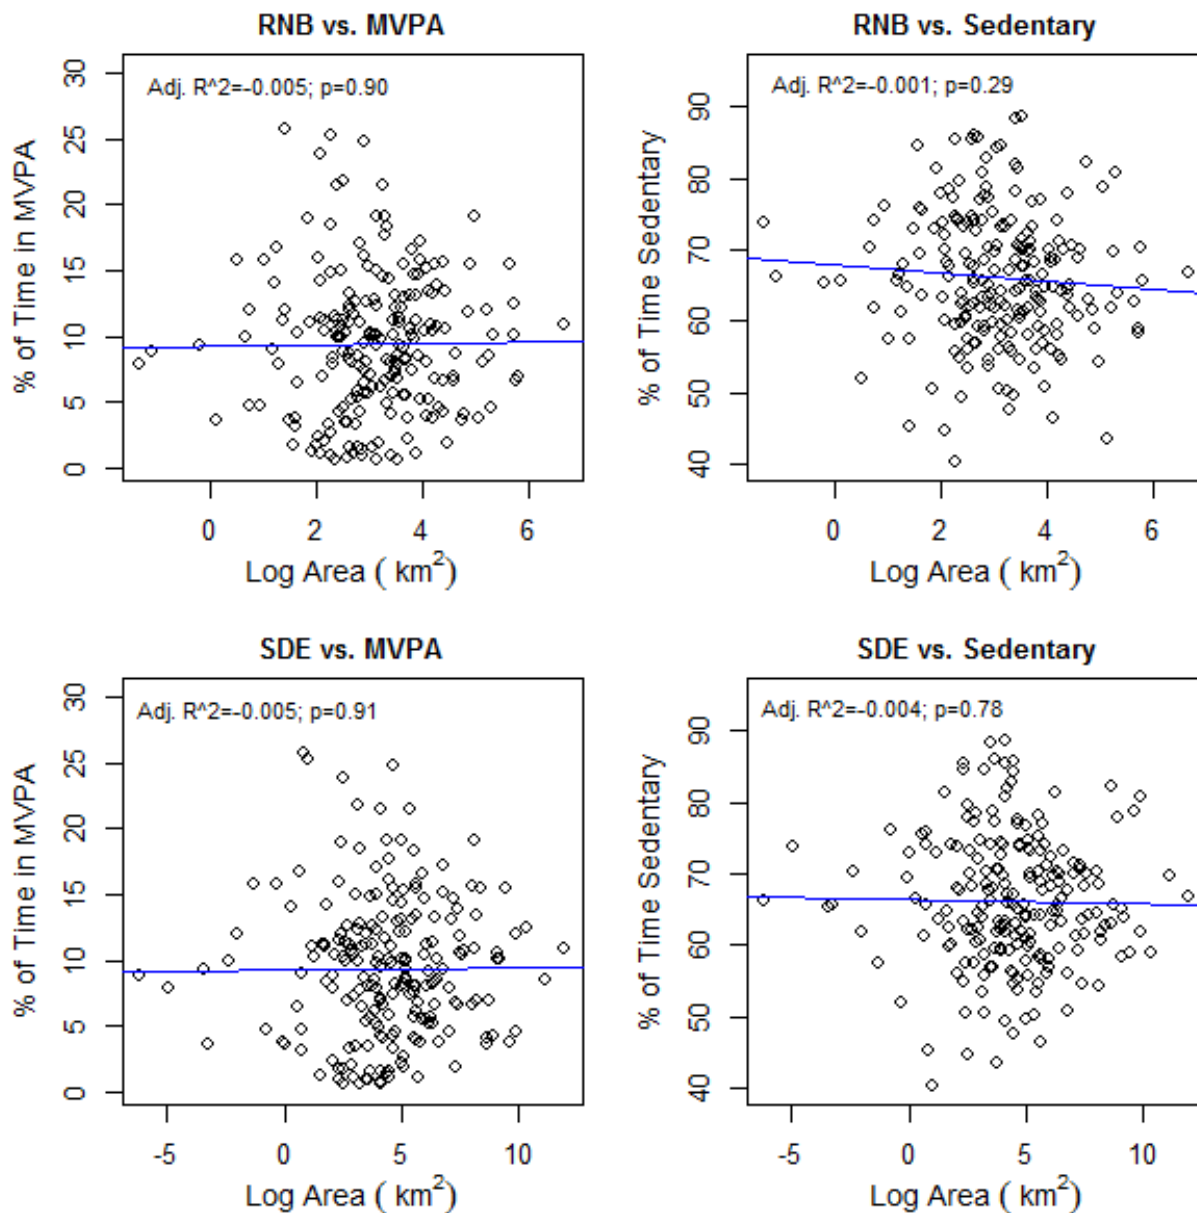

SDE=standard deviational ellipse; RNB=road network buffer; MVPA=moderate-vigorous physical activity
